# Supplementary material for: Homeobox NKX2-3 promotes marginal-zone lymphomagenesis by activating B-cell receptor signalling and shaping lymphocyte dynamics
Source: PubMed Central journal article supplement (PMC4911677; doi:10.1038/ncomms11889), 2016-06-14
Supplement: ncomms11889-s1.pdf [file ncomms11889-s1.pdf]

## SUPPLEMENTAL MATERIAL

### Homeobox NKX2-3 promotes marginal-zone lymphomagenesis by activating B-cell receptor signaling and shaping lymphocyte dynamics

## SUPPLEMENTARY FIGURES AND FIGURE LEGENDS

SUPPLEMENTARY FIGURE 1

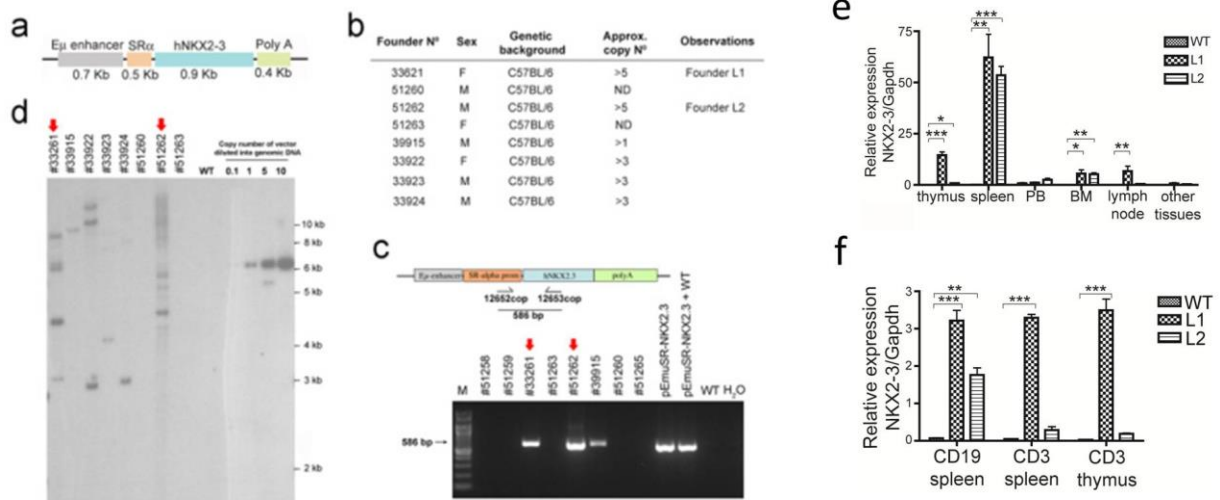

**Supplementary Figure 1: Generation and characterization of transgenic  $E\mu$ -NKX2-3 mice.** (a) Schematic representation of the  $E\mu$ SR $\alpha$ -hNKX2-3 transgenic vector used to generate  $E\mu$ -NKX2-3 mice. (b) Two founder mice generated (F0) were selected for generating L1 and L2 transgenic lines. (c) Schematic representation of the PCR strategy for transgenic mouse genotyping. PCR results of eight mice are shown. (d) Southern-blot analysis using the JMC1-A probe in transgenic mice. Red arrows in (c) and (d) mark those mice that were selected as founders in the study. (e-f) Expression of the *hNKX2-3* transgene measured by quantitative RT-PCR in WT and transgenic mice in (e) BM, PB and lymphoid tissues; and (f) isolated splenic CD19<sup>+</sup> and CD3<sup>+</sup> cells, and thymic CD3<sup>+</sup> cells.

Supplementary Figure 2

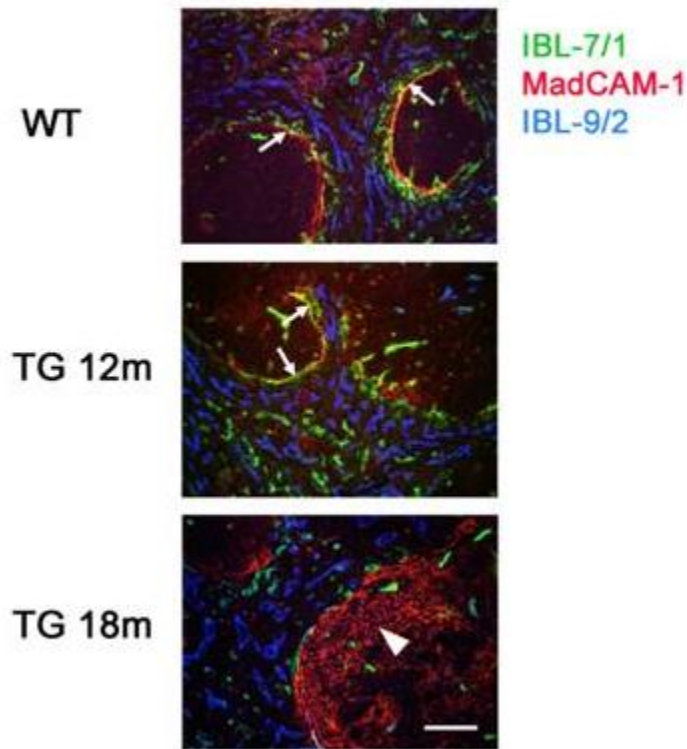

**Supplementary Figure 2: Immunofluorescence analysis of *E $\mu$ -NKX2-3* transgenic spleens.** Gradual loss of marginal sinus integrity in mice after 12 months is revealed through the loss of IBL-7/1 marker (green) from the marginal sinus (red [arrowheads in upper and middle panels]) and expansion of MAdCAM-1-positive follicular stromal reticulum (arrow in lower panel), with preserved red pulp vessels displaying IBL-9/2 marker<sup>1</sup> (blue). Scale bar = 200  $\mu$ m.

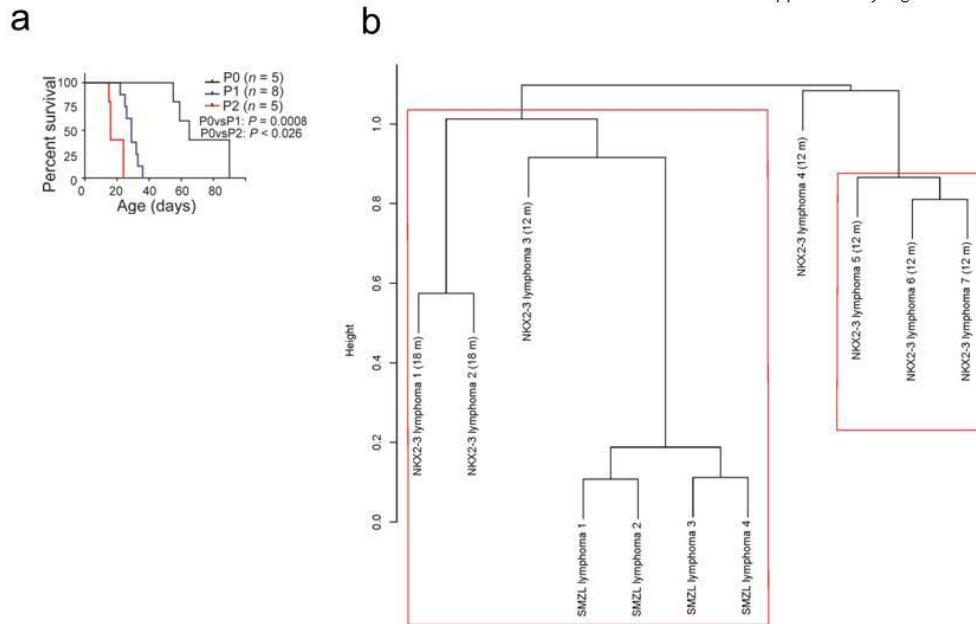

**Supplementary Figure 3: Characterization of transgenic  $E\mu$ -*NKX2-3* mice.** (a) Kaplan-Meier overall survival curves for immunodeficient  $Rag2^{-/-}IL2\gamma^{-/-}$  mice intravenously injected with  $2.5 \times 10^6$  splenic NKX2-3-expressing lymphoma cells from 18-month-old mice (P0). Survival curves for secondary (P1) and tertiary (P2) recipients are also shown. (b) Dendrogram from a hierarchical clustering analysis of the samples. Clusters with  $p < 0.05$  are shown in red.

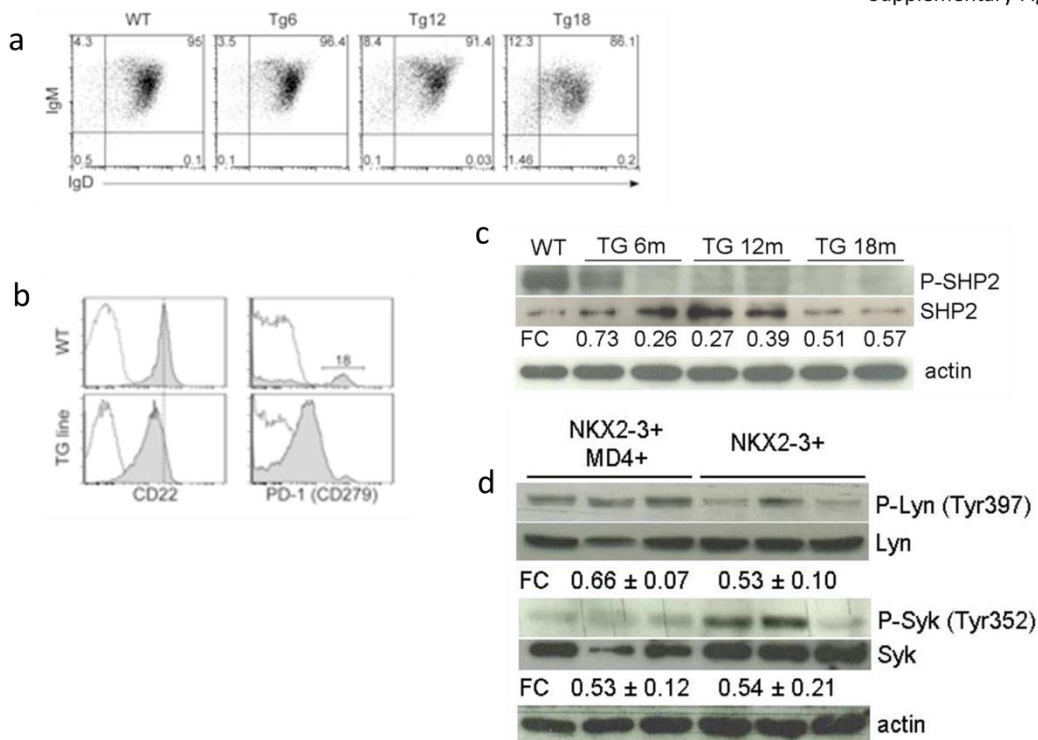

**Supplementary Figure 4: Expression and activity of BCR and of BCR signaling-related negative regulators in NKX2-3 transgenic B cells.** (a) Representative flow cytometry dotted plots of IgM and IgD expression levels at the surface of WT B cells and NKX2-3 transgenic (Tg) B cells (gated as CD19<sup>+</sup>) of distinct ages (Tg6, Tg12, and Tg18 are 6, 12, and 18-month-old mice, respectively). (b) Representative flow cytometry profiles (grey filled histogram) of CD22 and PD-1 (CD279) at the surface of WT B cells and of an established NKX2-3 transgenic tumoral B cell line (TG line). Dotted histogram, isotype control. Dashed black line, maximum CD22 expression level in WT B cells. In PD-1 profile of WT B cells, the percentage of PD-1<sup>+</sup> B cells detected is indicated. (c) Western blot analysis of phosphorylated SHP2 and total SHP2 proteins in wild-type and transgenic mice (d) Western blot analysis of phosphorylated Syk and Lyn kinases in NKX2-3 transgenic mice MD4 negative (polyclonal BCR repertoire) and three transgenic mice NKX2-3 MD4 positive (monoclonal BCR repertoire) at 6 months of age. These studies showed lower levels of activated Syk in the latter group in comparison to the MD4 negative mice, therefore suggesting that antigen stimulation of the BCR may have a role in the lymphomagenesis observed in our mouse model.

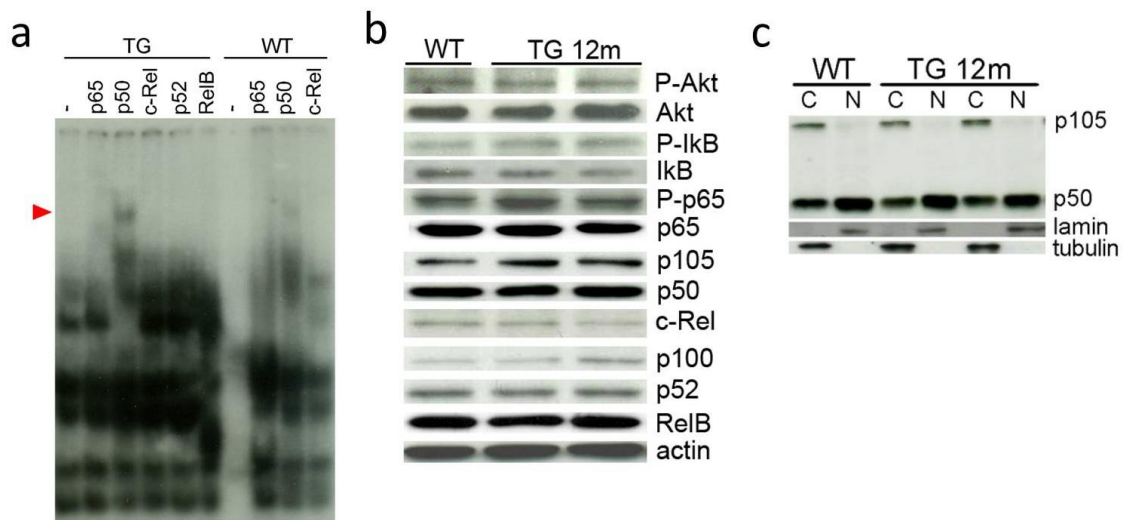

**Supplementary Figure 5: Analysis of NF-κB pathway activation in 12-month-old transgenic B cells.** (a) Protein-DNA interaction analyzed by electrophoretic mobility shift assay (EMSA) in nuclear extracts of CD19<sup>+</sup> cells isolated from transgenic and WT spleens, using a radiolabelled NF-κB consensus probe. Supershifts were performed using canonical and no-canonical antibodies. To induce NF-κB signaling, WT cells were stimulated in presence of anti-CD40 for 24 h. (b) Western-blot analysis of splenic CD19<sup>+</sup> cells isolated from WT and 12-months-old transgenic (TG) mice. (c) Western blot analysis of p105 and p50 proteins in cytoplasmic and nuclear extracts from WT and 12-months-old transgenic (TG) CD19<sup>+</sup> splenic cells.

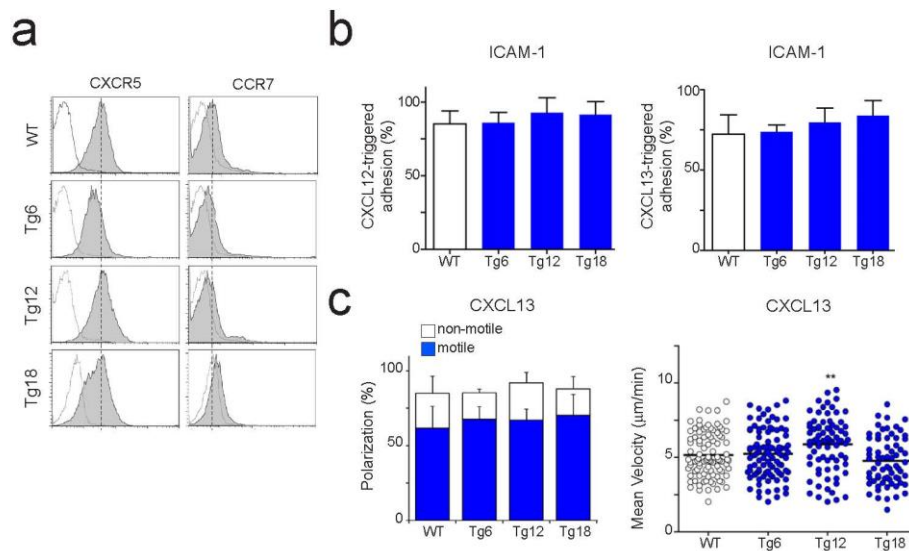

**Supplementary Figure 6: Characterization of cell dynamics in NKX2-3 transgenic B cells.** (a) Representative flow cytometry profiles (grey filled histogram) of the indicated molecules at the surface of WT B cells and NKX2-3 transgenic (Tg) B cells of distinct ages (Tg6, Tg12, and Tg18 are 6, 12, and 18-month-old mice, respectively). Dashed black line, maximum expression level in WT B cells. Dotted histogram, isotype control. (b) Adhesion frequencies to ICAM-1 membranes of WT and Tg-B cells in presence of CXCL12 (left) or CXCL13 (right) coating; data are the mean  $\pm$  SD ( $n = 2$ ). (c) Cell polarization frequencies, indicating the fractions of non-motile and motile cells, of WT and Tg-B cells settled on ICAM-1-membranes with CXCL13 coating (left); data are the mean  $\pm$  SD ( $n = 2$ ). Mean velocity values of motile B cells are shown (right); data are derived from two experiments and each dot is a single cell.

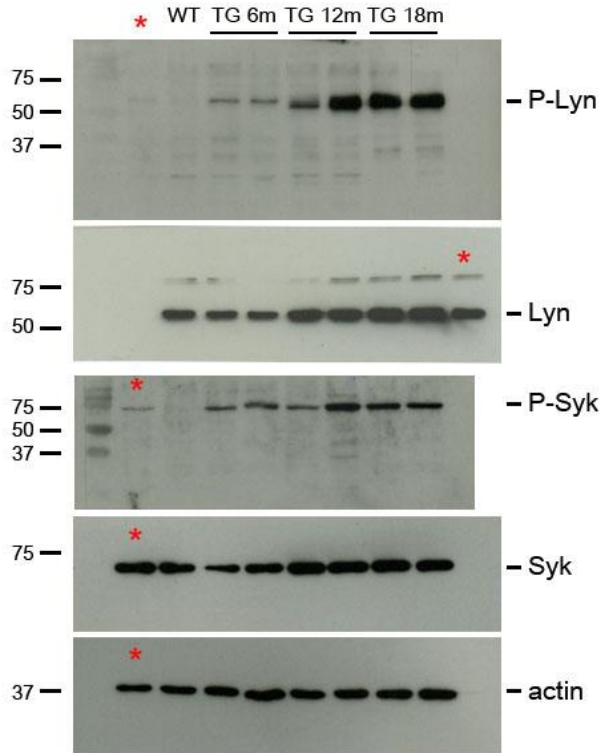

**Supplementary Figure 7: Expression of BCR signaling in *NKX2-3* transgenic B cells.** Uncropped version of the Western-blot shown in Figure 4e. Molecular weight markers (in kDa) are indicated (left). Red asterisk indicates internal control loaded in the Western-blot

## **SUPPLEMENTARY TABLES**

**Supplementary Table 1:** Summary of the single nucleotide polymorphism identified by direct sequencing in the two coding regions of the NKX2-3 gene in human lymphoma cell lines and SMZL patient samples.

| <b>SNP</b> | <b>Reference</b> | <b>Consensus</b> | <b>Samples</b>                                            |
|------------|------------------|------------------|-----------------------------------------------------------|
| rs41290504 | C                | A                | Namalwa, Rec1, RCK8, SSK41<br>SMZL patient samples (4/19) |
|            |                  | M                | OZ, SUDHL6, SUDHL8, HT<br>SMZL patient samples (9/19)     |
| rs10529697 | -                | Largedeleletion  | SMZL patient samples (19/19)                              |



**Supplementary Table 2:** FACS analysis of hematopoietic cell subpopulations in different tissues from WT and NKX2-3<sup>-/-</sup> deficient mice. The values represent the mean ± standard deviation (SD) of at least three mice.

| Age (months)            | 4             |                       | 8            |                             |
|-------------------------|---------------|-----------------------|--------------|-----------------------------|
|                         | WT            | Nkx2-3 <sup>-/-</sup> | WT           | Nkx2-3 <sup>-/-</sup>       |
| <b>PERIPHERAL BLOOD</b> |               |                       |              |                             |
| CD4                     | 48.87 ± 15.01 | 35.17 ± 11.17         | 60.60 ± 4.16 | 37.35 ± 1.34<br>(P = 0.001) |
| CD8                     | 17.93 ± 4.80  | 16.97 ± 4.92          | 18.50 ± 1.15 | 21.75 ± 3.75                |
| B cells                 | 28.23 ± 12.47 | 19.65 ± 6.58          | 27.93 ± 8.73 | 21.65 ± 3.32                |
| <b>BONE MARROW</b>      |               |                       |              |                             |
| HSC                     | 0.31 ± 0.07   | 0.28 ± 0.07           | 0.25 ± 0.09  | 0.19 ± 0.10                 |
| Pro B cells             | 1.04 ± 0.33   | 1.15 ± 0.04           | 0.41 ± 0.02  | 0.61 ± 0.19                 |
| Pre B cells             | 15.10 ± 1.87  | 13.70 ± 2.36          | 5.02 ± 0.94  | 4.84 ± 0.65                 |
| Immature B cells        | 5.88 ± 0.75   | 5.92 ± 1.70           | 3.46 ± 0.69  | 5.34 ± 0.16                 |
| Recirculating B cells   | 1.94 ± 0.79   | 1.48 ± 0.65           | 6.03 ± 0.77  | 5.34 ± 2.6                  |

| Age (months)      | 4            |                             | 8             |                            |
|-------------------|--------------|-----------------------------|---------------|----------------------------|
|                   | WT           | Nkx2-3 <sup>-/-</sup>       | WT            | Nkx2-3 <sup>-/-</sup>      |
| <b>THYMUS</b>     |              |                             |               |                            |
| CD4               | 6.46 ± 0.66  | 7.46 ± 1.99                 | 7.75 ± 1.74   | 10.66 ± 4.44               |
| CD8               | 1.65 ± 0.32  | 2.01 ± 0.27                 | 1.49 ± 0.51   | 1.40 ± 0.40                |
| CD4 CD8 DP        | 86.67 ± 1.26 | 83.93 ± 0.95                | 63.53 ± 11.97 | 78.90 ± 4.53               |
| CD4 CD8 DN        | 2.50 ± 0.21  | 2.68 ± 1.51                 | 2.59 ± 0.61   | 2.05 ± 0.27                |
| <b>SPLEEN</b>     |              |                             |               |                            |
| CD4               | 50.13 ± 1.38 | 68.60 ± 4.69                | 38.90 ± 7.63  | 64.25 ± 4.60               |
| CD8               | 22.13 ± 1.16 | 24.20 ± 1.97                | 16.57 ± 2.90  | 28.15 ± 1.06               |
| B-Cells           | 40.13 ± 4.99 | 12.23 ± 2.01                | 24.43 ± 8.39  | 13.65 ± 3.04               |
| T1 B Cells        | 6.87 ± 1.24  | 6.26 ± 3.14                 | 7.52 ± 1.41   | 8.83 ± 3.35                |
| Inmat. B-Cells    | 19.03 ± 4.65 | 7.86 ± 2.69                 | 16.83 ± 0.85  | 9.79 ± 3.45                |
| FO B-Cells        | 81.43 ± 4.28 | 89.87 ± 4.06                | 74.73 ± 4.34  | 87.55 ± 3.61               |
| MZ B-Cells        | 6.94 ± 1.24  | 0.53 ± 0.22<br>(P = 0.0009) | 12.57 ± 3.75  | 0.60 ± 0.06<br>(P = 0.005) |
| <b>LYMPH NODE</b> |              |                             |               |                            |
| CD4               | 66.60 ± 7.24 | 60.43 ± 6.62                | 74.90 ± 1.70  | 60.90 ± 0.42               |
| CD8               | 27.67 ± 1.50 | 32.87 ± 0.74                | 22.00 ± 2.83  | 36.20 ± 1.27               |
| B cells           | 31.71 ± 3.54 | 28.87 ± 3.04                | 21.35 ± 8.70  | 21.25 ± 0.78               |

**Supplementary Table 3:** Peripheral blood counts obtained from Hemavet cell counter in WT and E $\mu$ -*NKX2-3* transgenic mice. Data represent the mean  $\pm$  standard deviation (SD) of at least three mice.

| Age (months)     | 4                |                               |                  | 12               |                                 |                                | 18               |                                 |                                |
|------------------|------------------|-------------------------------|------------------|------------------|---------------------------------|--------------------------------|------------------|---------------------------------|--------------------------------|
| Mice             | WT               | L1                            | L2               | WT               | L1                              | L2                             | WT               | L1                              | L2                             |
| WBC (K/ $\mu$ L) | 9.19 $\pm$ 2.65  | 4.86 $\pm$ 1.74<br>(P = 0.03) | 8.53 $\pm$ 4.00  | 12.18 $\pm$ 2.51 | 6.20 $\pm$ 2.60<br>(P = 0.002)  | 6.43 $\pm$ 2.61<br>(P = 0.01)  | 10.53 $\pm$ 1.77 | 5.05 $\pm$ 2.44<br>(P < 0.0001) | 6.23 $\pm$ 1.35<br>(P = 0.001) |
| NE (K/ $\mu$ L)  | 1.96 $\pm$ 0.69  | 1.35 $\pm$ 0.55               | 1.27 $\pm$ 0.19  | 2.61 $\pm$ 0.86  | 1.77 $\pm$ 0.67                 | 1.63 $\pm$ 0.75                | 2.29 $\pm$ 0.67  | 2.05 $\pm$ 1.00                 | 1.66 $\pm$ 0.86                |
| LY (K/ $\mu$ L)  | 6.27 $\pm$ 1.28  | 3.03 $\pm$ 1.13<br>(P = 0.02) | 5.08 $\pm$ 2.74  | 8.79 $\pm$ 1.54  | 4.01 $\pm$ 1.88<br>(P = 0.0005) | 4.06 $\pm$ 1.61<br>(P = 0.004) | 7.58 $\pm$ 1.43  | 2.55 $\pm$ 1.35<br>(P = 0.0004) | 3.75 $\pm$ 1.00<br>(P = 0.006) |
| MO (K/ $\mu$ L)  | 0.75 $\pm$ 0.04  | 0.46 $\pm$ 0.21               | 0.56 $\pm$ 0.24  | 0.69 $\pm$ 0.15  | 0.28 $\pm$ 0.10<br>(P = 0.003)  | 0.52 $\pm$ 0.24                | 0.64 $\pm$ 0.21  | 0.33 $\pm$ 0.18<br>(P = 0.03)   | 0.43 $\pm$ 0.11                |
| EO (K/ $\mu$ L)  | 0.18 $\pm$ 0.07  | 0.01 $\pm$ 0.01               | 0.08 $\pm$ 0.05  | 0.07 $\pm$ 0.10  | 0.11 $\pm$ 0.08                 | 0.16 $\pm$ 0.09                | 0.01 $\pm$ 0.02  | 0.08 $\pm$ 0.05                 | 0.11 $\pm$ 0.09                |
| BA (K/ $\mu$ L)  | 0.02 $\pm$ 0.02  | 0.01 $\pm$ 0.01               | 0.01 $\pm$ 0.001 | 0.02 $\pm$ 0.02  | 0.03 $\pm$ 0.03                 | 0.04 $\pm$ 0.03                | 0.01 $\pm$ 0.01  | 0.02 $\pm$ 0.02                 | 0.005 $\pm$ 0.004              |
| RBC (M/ $\mu$ L) | 9.14 $\pm$ 0.21  | 9.58 $\pm$ 1.39               | 7.50 $\pm$ 1.05  | 9.58 $\pm$ 0.61  | 9.78 $\pm$ 1.81                 | 8.82 $\pm$ 0.60                | 9.38 $\pm$ 1.08  | 9.19 $\pm$ 1.54                 | 9.41 $\pm$ 1.13                |
| Hb (gr/dL)       | 14.30 $\pm$ 0.41 | 15.27 $\pm$ 2.15              | 12.72 $\pm$ 0.75 | 14.52 $\pm$ 0.96 | 14.48 $\pm$ 2.42                | 14.85 $\pm$ 0.93               | 13.85 $\pm$ 1.15 | 14.39 $\pm$ 1.86                | 15.00 $\pm$ 1.63               |

**Supplemental Table 4:** Sequential FACS analysis of hematopoietic cell subpopulations (thymus, spleen, peripheral blood, bone marrow and lymph node) in WT and E $\mu$ -NKX2-3 transgenic mice (L1 and L2) at 4, 12 and 18 months. Data represent the mean  $\pm$  standard deviation (SD) of at least three mice.

| Age (months)   | WT               | 4<br>L1                       | L2               | WT               | 12<br>L1                       | L2               | WT               | 18<br>L1                       | L2               |
|----------------|------------------|-------------------------------|------------------|------------------|--------------------------------|------------------|------------------|--------------------------------|------------------|
| <b>THYMUS</b>  |                  |                               |                  |                  |                                |                  |                  |                                |                  |
| CD4            | 3.19 $\pm$ 0.35  | 2.62 $\pm$ 0.58               | 3.05 $\pm$ 0.43  | 2.74 $\pm$ 0.97  | 2.57 $\pm$ 0.63                | 2.65 $\pm$ 1.32  | 2.99 $\pm$ 0.53  | 2.96 $\pm$ 0.73                | 2.82 $\pm$ 0.09  |
| CD8            | 0.98 $\pm$ 0.10  | 1.05 $\pm$ 0.43               | 1.08 $\pm$ 0.32  | 1.16 $\pm$ 0.33  | 1.17 $\pm$ 0.49                | 1.15 $\pm$ 0.54  | 1.47 $\pm$ 0.64  | 1.18 $\pm$ 0.88                | 1.21 $\pm$ 0.15  |
| CD4 CD8 DN     | 1.39 $\pm$ 0.22  | 1.70 $\pm$ 0.38               | 1.30 $\pm$ 0.18  | 1.41 $\pm$ 0.45  | 2.17 $\pm$ 1.02                | 1.99 $\pm$ 0.04  | 1.62 $\pm$ 0.75  | 1.87 $\pm$ 0.48                | 2.24 $\pm$ 0.44  |
| CD4 CD8 DP     | 92.53 $\pm$ 0.12 | 92.87 $\pm$ 1.17              | 91.35 $\pm$ 1.21 | 92.60 $\pm$ 0.46 | 92.03 $\pm$ 0.49               | 89.65 $\pm$ 1.87 | 91.67 $\pm$ 1.70 | 86.60 $\pm$ 1.83               | 80.11 $\pm$ 1.27 |
| <b>SPLEEN</b>  |                  |                               |                  |                  |                                |                  |                  |                                |                  |
| CD4            | 53.07 $\pm$ 6.22 | 48.57 $\pm$ 6.00              | 49.03 $\pm$ 2.26 | 47.95 $\pm$ 6.02 | 49.98 $\pm$ 7.91               | 52.60 $\pm$ 3.81 | 51.88 $\pm$ 5.22 | 56.58 $\pm$ 9.60               | 52.65 $\pm$ 7.85 |
| CD8            | 29.60 $\pm$ 1.68 | 27.67 $\pm$ 2.11              | 33.75 $\pm$ 2.47 | 28.12 $\pm$ 9.35 | 22.48 $\pm$ 6.99               | 27.25 $\pm$ 3.49 | 29.88 $\pm$ 3.50 | 18.48 $\pm$ 3.47<br>(P = 0.01) | 31.05 $\pm$ 0.21 |
| B-Cells        | 51.98 $\pm$ 3.29 | 39.92 $\pm$ 8.71              | 49.70 $\pm$ 0.74 | 54.80 $\pm$ 7.60 | 49.83 $\pm$ 8.83               | 54.85 $\pm$ 6.72 | 54.04 $\pm$ 4.13 | 51.43 $\pm$ 11.24              | 60.50 $\pm$ 0.42 |
| T1 B Cells     | 17.53 $\pm$ 1.00 | 17.47 $\pm$ 4.35              | 18.43 $\pm$ 0.99 | 23.50 $\pm$ 2.21 | 18.72 $\pm$ 5.02               | 19.9 $\pm$ 1.13  | 21.82 $\pm$ 3.49 | 12.58 $\pm$ 0.85<br>(P = 0.03) | 19.60 $\pm$ 0.75 |
| Inmat. B-Cells | 16.70 $\pm$ 3.47 | 15.62 $\pm$ 1.00              | 15.15 $\pm$ 0.49 | 13.60 $\pm$ 2.00 | 14.96 $\pm$ 6.77               | 12.9 $\pm$ 2.55  | 12.22 $\pm$ 2.80 | 10.65 $\pm$ 3.46               | 12.65 $\pm$ 0.07 |
| FO B-Cells     | 78.65 $\pm$ 3.18 | 75.24 $\pm$ 3.33              | 83.80 $\pm$ 3.54 | 83.30 $\pm$ 1.04 | 73.82 $\pm$ 5.59<br>(P = 0.01) | 79.28 $\pm$ 2.35 | 82.62 $\pm$ 4.95 | 67.05 $\pm$ 6.64<br>(P = 0.02) | 82.58 $\pm$ 6.64 |
| MZ B-Cells     | 5.37 $\pm$ 1.27  | 8.36 $\pm$ 1.79<br>(P = 0.02) | 5.96 $\pm$ 1.85  | 5.67 $\pm$ 1.48  | 5.95 $\pm$ 1.46                | 4.99 $\pm$ 1.69  | 5.29 $\pm$ 1.57  | 6.11 $\pm$ 1.28<br>(P = 0.03)  | 5.10 $\pm$ 0.12  |

---

**LYMPH NODE**

|         |               |              |              |              |              |              |              |              |              |
|---------|---------------|--------------|--------------|--------------|--------------|--------------|--------------|--------------|--------------|
| CD4     | 50.73 ± 12.45 | 59.40 ± 0.36 | 49.90 ± 5.09 | 53.27 ± 5.20 | 48.07 ± 6.96 | 48.22 ± 0.57 | 53.87 ± 1.81 | 52.47 ± 2.02 | 52.30 ± 0.71 |
| CD8     | 33.13 ± 10.03 | 35.23 ± 0.99 | 42.30 ± 5.34 | 41.93 ± 8.34 | 48.40 ± 7.54 | 43.75 ± 1.24 | 42.77 ± 0.80 | 38.83 ± 0.95 | 40.95 ± 0.69 |
| B-Cells | 94.33 ± 0.81  | 92.93 ± 1.29 | 90.45 ± 1.23 | 93.07 ± 1.72 | 88.27 ± 4.48 | 90.64 ± 2.15 | 95.20 ± 0.98 | 87.57 ± 0.91 | 93.87 ± 2.13 |

---

**PERIPHERAL BLOOD**

|              |              |                             |               |              |               |               |               |                             |                             |
|--------------|--------------|-----------------------------|---------------|--------------|---------------|---------------|---------------|-----------------------------|-----------------------------|
| CD4          | 47.50 ± 1.91 | 43.30 ± 3.56                | 33.18 ± 1.76  | 29.18 ± 9.12 | 25.42 ± 10.79 | 21.53 ± 10.52 | 23.93 ± 3.50  | 10.57 ± 5.27<br>(P = 0.005) | 15.95 ± 3.93<br>(P = 0.008) |
| CD8          | 32.53 ± 1.55 | 32.72 ± 2.27                | 37.05 ± 11.91 | 35.66 ± 9.14 | 33.60 ± 11.30 | 27.37 ± 12.88 | 34.82 ± 10.27 | 16.09 ± 9.28<br>(P = 0.01)  | 22.52 ± 4.54<br>(P = 0.005) |
| B-Cells      | 35.17 ± 2.94 | 24.08 ± 4.09<br>(P = 0.008) | 34.07 ± 7.93  | 38.82 ± 5.26 | 31.23 ± 10.03 | 33.40 ± 10.27 | 51.47 ± 5.55  | 15.71 ± 7.22<br>(P = 0.02)  | 29.49 ± 7.45<br>(P = 0.01)  |
| Granulocytes | 26.23 ± 0.92 | 22.86 ± 7.76                | 24.05 ± 1.69  | 32.46 ± 6.80 | 28.58 ± 9.21  | 25.18 ± 3.25  | 40.73 ± 3.62  | 43.17 ± 7.52                | 41.98 ± 8.63                |
| Macrophages  | 2.72 ± 0.59  | 2.37 ± 0.90                 | 2.76 ± 1.88   | 2.19 ± 0.66  | 1.94 ± 0.47   | 2.59 ± 1.56   | 1.92 ± 0.68   | 1.89 ± 0.49                 | 2.45 ± 1.04                 |

---

| Age (months)       | 4            |              |              | 12           |               |              | 18           |                           |              |
|--------------------|--------------|--------------|--------------|--------------|---------------|--------------|--------------|---------------------------|--------------|
|                    | WT           | L1           | L2           | WT           | L1            | L2           | WT           | L1                        | L2           |
| <b>BONE MARROW</b> |              |              |              |              |               |              |              |                           |              |
| pro & pre B-Cells  | 8.23 ± 1.31  | 7.52 ± 1.77  | 8.38 ± 0.23  | 3.94 ± 0.31  | 5.18 ± 0.96   | 5.89 ± 1.50  | 6.85 ± 1.53  | 7.42 ± 2.41               | 4.99 ± 0.10  |
| pro B-Cells        | 1.23 ± 0.41  | 2.50 ± 1.47  | 1.16 ± 0.32  | 0.82 ± 0.38  | 1.73 ± 0.54   | 1.06 ± 0.65  | 0.94 ± 0.38  | 2.12 ± 0.93               | 1.10 ± 0.17  |
| pre B-Cells        | 3.94 ± 1.03  | 2.49 ± 2.09  | 3.07 ± 1.78  | 0.98 ± 0.36  | 0.65 ± 0.43   | 0.85 ± 0.69  | 2.08 ± 1.03  | 1.44 ± 0.93               | 1.82 ± 0.62  |
| Inmat. B-Cells     | 1.64 ± 0.38  | 1.32 ± 0.33  | 2.96 ± 0.09  | 0.78 ± 0.19  | 0.48 ± 0.20   | 1.53 ± 0.71  | 1.73 ± 0.21  | 0.98 ± 0.48               | 2.50 ± 0.13  |
| Recirc. B-Cells    | 5.25 ± 0.50  | 5.25 ± 1.57  | 6.91 ± 0.48  | 5.60 ± 1.57  | 5.19 ± 2.45   | 4.45 ± 1.32  | 7.53 ± 2.23  | 3.31 ± 2.84<br>(P = 0.03) | 10.1 ± 1.90  |
| Granulocytes       | 54.50 ± 8.30 | 56.07 ± 7.64 | 49.40 ± 5.89 | 65.47 ± 5.99 | 54.40 ± 10.04 | 48.95 ± 0.21 | 60.70 ± 5.01 | 54.07 ± 1.86              | 58.40 ± 1.84 |
| Macrophages        | 6.13 ± 1.18  | 5.90 ± 1.46  | 9.93 ± 2.36  | 8.31 ± 1.46  | 7.23 ± 0.85   | 7.23 ± 0.59  | 6.85 ± 1.76  | 8.81 ± 3.92               | 7.86 ± 1.87  |
| HSC                | 0.76 ± 0.48  | 1.23 ± 0.79  | 0.70 ± 0.01  | 1.18 ± 0.30  | 1.05 ± 0.15   | 1.27 ± 0.40  | 0.95 ± 0.18  | 1.14 ± 0.21               | 0.66 ± 0.14  |

**Supplementary Table 5:** Anatomic location of lymphomas developed in E $\mu$ -*NKX2-3* mice (L1 and L2).

| ID  | Line | Splenomegaly | Small intestine | Liver | Lung | Kidney | Salivary gland | Age (months) |
|-----|------|--------------|-----------------|-------|------|--------|----------------|--------------|
| 6   | 1    | YES          | YES             | NO    | NO   | YES    | NO             | 20           |
| 39  | 1    | YES          | YES             | YES   | YES  | NO     | NO             | 23           |
| 785 | 1    | YES          | YES             | NO    | NO   | YES    | YES            | 19           |
| 782 | 1    | YES          | YES             | YES   | YES  | YES    | YES            | 18           |
| 757 | 1    | YES          | YES             | NO    | NO   | YES    | NO             | 19           |
| 761 | 1    | YES          | NO              | NO    | NO   | NO     | NO             | 19           |
| 202 | 1    | YES          | YES             | YES   | YES  | YES    | YES            | 20           |
| 846 | 1    | YES          | NO              | NO    | NO   | NO     | NO             | 18           |
| 962 | 1    | YES          | YES             | NO    | NO   | YES    | YES            | 19           |
| 964 | 1    | YES          | YES             | NO    | NO   | YES    | YES            | 20           |
| 956 | 1    | YES          | NO              | NO    | NO   | NO     | NO             | 17           |
| 168 | 1    | YES          | YES             | NO    | NO   | YES    | NO             | 18           |
| 484 | 1    | YES          | YES             | NO    | NO   | NO     | NO             | 23           |
| 498 | 1    | YES          | YES             | YES   | NO   | YES    | NO             | 23           |
| 489 | 1    | YES          | YES             | YES   | NO   | YES    | YES            | 16           |
| 497 | 1    | YES          | YES             | YES   | YES  | YES    | YES            | 12           |
| 669 | 1    | YES          | YES             | YES   | NO   | YES    | NO             | 17           |
| 627 | 1    | YES          | YES             | NO    | NO   | NO     | NO             | 18           |
| 257 | 1    | YES          | YES             | NO    | NO   | NO     | NO             | 19           |
| 180 | 1    | YES          | YES             | YES   | NO   | YES    | NO             | 18           |
| 179 | 1    | YES          | NO              | YES   | NO   | NO     | NO             | 22           |
| 687 | 1    | YES          | YES             | YES   | NO   | NO     | NO             | 20           |
| 646 | 1    | YES          | YES             | YES   | NO   | YES    | NO             | 18           |
| 582 | 1    | YES          | NO              | NO    | NO   | NO     | NO             | 12           |
| 563 | 1    | YES          | YES             | YES   | YES  | YES    | NO             | 12           |
| 580 | 1    | YES          | YES             | NO    | NO   | YES    | NO             | 12           |
| 194 | 2    | YES          | YES             | YES   | NO   | YES    | NO             | 25           |
| 833 | 2    | YES          | YES             | YES   | YES  | YES    | NO             | 25           |

|     |   |     |     |     |    |     |    |    |
|-----|---|-----|-----|-----|----|-----|----|----|
| 622 | 2 | YES | YES | NO  | NO | NO  | NO | 16 |
| 142 | 2 | YES | YES | YES | NO | NO  | NO | 22 |
| 169 | 2 | YES | YES | YES | NO | NO  | NO | 20 |
| 831 | 2 | YES | YES | YES | NO | YES | NO | 20 |
| 826 | 2 | YES | NO  | NO  | NO | YES | NO | 20 |
| 581 | 2 | YES | YES | YES | NO | YES | NO | 18 |
| 487 | 2 | YES | YES | NO  | NO | NO  | NO | 24 |
| 833 | 2 | YES | YES | YES | NO | YES | NO | 25 |
| 841 | 2 | YES | NO  | NO  | NO | NO  | NO | 25 |
| 999 | 2 | YES | NO  | NO  | NO | NO  | NO | 18 |



**Supplementary Table 6:** High-resolution comparative genomic hybridization (aCGH) analysis of 14 clonal lymphomas developed in 18-month-old E $\mu$ -NKX2-3 transgenic mice.

| Number | ID  | Gains                                                                                                         | Losses                                        |
|--------|-----|---------------------------------------------------------------------------------------------------------------|-----------------------------------------------|
| 1      | 487 | 15qA1-qF3                                                                                                     | 11qE2<br>16qC1.3-qC4                          |
| 2      | 437 | 14qA1-qC3<br>15qA1-qF3<br>17qA1-qE5                                                                           | 8qD3<br>14qC3-qD3<br>16qC3.3-qC4              |
| 3      | 498 | 17qA1-qE5<br>15qA1-qF3                                                                                        | 6qC1<br>12qF1-qF2<br>16qC3.3-qC4<br>18qD1-qD3 |
| 4      | 445 | 17qA1-qE5                                                                                                     | 12qF1<br>16qC3.3-qC4                          |
| 5      | 179 | 14qD2<br>15qA1-qF3                                                                                            | 12qF1<br>17qE1.2                              |
| 6      | 549 | 14qD3-qE5<br>10qB5.3                                                                                          | 17qE1.2<br>18qA2                              |
| 7      | 687 | 2qA1-qH4<br>5qG1.1-qG3<br>10qA1-qD3<br>10qB5.3<br>11qB4<br>13qA1-qD2.3<br>14qA1-qE5<br>15qA1-qF3<br>17qA1-qE5 | 17qE1.2                                       |

|   |      |           |               |
|---|------|-----------|---------------|
| 8 | 6683 | 9qA1-qF4  | 2qC1.3-qE1    |
|   |      | 10qA4     | 10qA1-qA2     |
|   |      | 14qD2     | 10qA4-qB2     |
|   |      | 14qD3-qE5 | 10qD1         |
|   |      | 15qA1-qF3 | 11qA1-qA3.2   |
|   |      | 18qA1-qE4 | 19qC1         |
|   |      | 19qB-qD3  |               |
|   |      | 19qC2     |               |
|   |      | 19qD2     |               |
| 9 | 400  | 2qA1-qB   | 2qB-qC1.3     |
|   |      | 18qA1-qE4 | 2qC1.3-qE1    |
|   |      | 5qF-qG3   | 2qE1-qH4      |
|   |      | 9qA1-qA4  | 4qA1-qE2      |
|   |      | 10qC2-qD1 | 5qA1-qF       |
|   |      | 10qD2-qD3 | 8qA1.1-qE2    |
|   |      | 11qE2     | 10qA1-qB5.3   |
|   |      | 14qD2     | 10qA1-qA2     |
|   |      | 14qD3-qE5 | 11qA1-qA3.2   |
|   |      | 15qA1-qF3 | 11qA1-qC      |
|   |      | 18qA1-qE4 | 12qA1.1-qF1   |
|   |      | 19qC2     | 13qA3.1-qD2.3 |
|   |      |           | 16qA1-qC4     |

**Supplementary Table 7:** List of the primers used in the study for gene sequencing, genotyping, gene expression (quantitative RT-PCR), and Q-PCR-ChIP analyses. All primers are listed as 5'-3'.

For sequencing

| NAME         | FORWARD             | REVERSE              |
|--------------|---------------------|----------------------|
| NKX2-3 exon1 | GTCTGTCAAAGCCCGACTC | CACCTCGTCCTTGTCTCTCC |
| NKX2-3 exon2 | GCCATTTACTACCGCACG  | CCCTGAGGAGCTAGACGTAC |

For genotyping

| NAME          | SEQUENCE                   |
|---------------|----------------------------|
| 12652cop      | CCTGACCCTGCTTGCTCAACTCTACG |
| 12563cop      | TCATGTTTCCTTGGGCTCGCTGC    |
| 12660PRO-JMC1 | GACTTTTGCAGGCTCCACCAGACC   |
| 12661PRO-JMC1 | AGCAAGCAGGGTCAGGCAAAGC     |

For gene expression

| NAME         | FORWARD              | REVERSE              |
|--------------|----------------------|----------------------|
| Human NKX2-3 | GCTATGTCCACACGGTCCTG | CAGTCTCCGGCCGTCTCT   |
| Mouse Nkx2-3 | GCTTACAGCGGCAGCTA    | GGTTGCTCACGTTCAAA    |
| Human GAPDH  | ACTTTGTCAAGCTCATTTC  | CACAGGGTACTTTATTGATG |
| Mouse Gapdh  | ACTTTGTCAAGCTCATTTC  | TGCAGCGAACTTTATTGATG |

For pyrosequencing analysis of NKX2-3

| PRIMERS    | SEQUENCE                                   | PCR product |
|------------|--------------------------------------------|-------------|
| NKX2-3-D   | GTGACGTACTAGCAACGGTTTTTGTAGTGGTTGTA        | 232 bp      |
| NKX2-3-R   | TAGCAGGATACGACTATCAAACCACTTAATTATCCAATCCAA |             |
| USF        | GTGACGTACTAGCAACG                          |             |
| BIOTIN-USR | (bio)TAGCAGGATACGACTATC                    |             |

| INTERMEDIATE PYROSEQUENCING PRIMERS |                                 |
|-------------------------------------|---------------------------------|
| NKX2-3-PYR-1                        | GTTTTTGTAGTGGTTGTAATAAAAATTTAGA |
| NKX2-3-PYR-2                        | GATTTAGATTGGAGTGGGA             |
| NKX2-3-PYR-3                        | GGAGTTTAGGAGGAGAGTTGGA          |

For Q-PCR-ChIP analysis

| NKX2-3     | PRIMERS/<br>PROBES | SEQUENCES                      | PCR<br>product |
|------------|--------------------|--------------------------------|----------------|
| Promoter   | NKX2-3-P-D         | CAGGCAGGCACATACAGCTA           | 79 bp          |
|            | NKX2-3-P-R         | CCTGCAGCTTGTGTTAGCAA           |                |
|            | NKX2-3-P-P         | FAMGGGAAGTGATAAGTGACATGCATAMRA |                |
| First exon | NKX2-3-E-D         | GTCCCTGCAGTGGCTGTAAC           | 77 bp          |
|            | NKX2-3-E-R         | CGGTCCCCTCCAGTCTAAA            |                |
|            | NKX2-3-E-P         | FAMAAACCCAGACCCCCAGGTTAMRA     |                |

For LDI-PCR studies

| PRIMER | SEQUENCE                                      | APPLICATION                           |
|--------|-----------------------------------------------|---------------------------------------|
| J6E    | CCCACAGGCAGTAGCAGAAAACAA                      | External J6 primer                    |
| J6I    | TCTGGGCTCGAGTCGACGCAGAAAACAAAGGCCCTAG<br>AGGG | Internal J6 primer                    |
| JBE    | GAAGCAGGTCACCGCGAGAGT                         | External primer for BglIII digests    |
| JBI    | CTTCTGGTTGTGAAGAGGTGGTTTTG                    | Internal primer for BglIII digests    |
| JHE    | TGGGATGCGTGGCTTCTGCT                          | External primer for HindIII digests   |
| JHI    | GCCCTTGTTAATGGACTTGGAGGA                      | Internal primer for HindIII digests   |
| JXE    | CACTGGCATCGCCCTTTGTCTAA                       | External primer for XbaI/PstI digests |
| JXI    | CCCATGCCTTCCAAAGCGATT                         | External primer for XbaI/PstI digests |

**Supplementary Table 8:** Antibodies used in the study for immunohistochemistry (IHC), immunofluorescence (IF), Western blot (WB) and EMSA (h, human; m, mouse).

| <b>ANTIBODY</b>           | <b>FROM</b>              | <b>USE</b>      |
|---------------------------|--------------------------|-----------------|
| Nkx2-3 454C (h, m)        | cf. Methods              | IHC, IF (1:200) |
| Actin (h, m)              | Oncogene Research, Merck | WB (1:1,000)    |
| CD20 (m)                  | Dako Cytomation          | IHC (1:50)      |
| CD3 (m)                   | Santa Cruz               | IHC (1:20)      |
| IgM (m)                   | Serotec                  | IHC (1:50)      |
| IgD (m)                   | Monosan                  | IHC (1:50)      |
| CD10 (m)                  | Santa Cruz               | IHC (1:50)      |
| TdT (m)                   | Abcam                    | IHC (1:100)     |
| Gcet1 (m)                 | Abcam                    | IHC (1:100)     |
| Mum1 (m)                  | Abcam                    | IHC (1:100)     |
| Bcl2 (m)                  | Epitomics                | IHC (1:200)     |
| Bcl6 (m)                  | Santa Cruz               | IHC (1:100)     |
| Bcl10 (m)                 | Santa Cruz               | IHC (1:100)     |
| Foxp1 (m)                 | Abcam                    | IHC (1:200)     |
| MadCAM-1 (m)              | Santa Cruz               | IF              |
| IBL-11 (m)                | Ref. 60                  | IF              |
| IgM (m)                   | Serotec                  | IF              |
| MOMA-1 (m)                | AbD Serotec              | IF              |
| MARCO (m) clone IBL-12    | Ref. 59                  | IF              |
| CD21/35 (m)               | BD Biosciences           | IF              |
| VCAM-1 (m)                | BD Biosciences           | IF              |
| ICAM-1 (m)                | Provided by Dr. Szakal   | IF              |
| IBL-7/1 (m)               | Ref. 61                  | IF              |
| IBL-9/2 (m)               | Ref. 61                  | IF              |
| Sn/CD169 (m) clone IBL-13 | Ref. 59                  | IF              |
| CR1/2/CD21 (m) clone 7G6  | BD Biosciences           | IF              |
| B220 (m) clone RA3-6B2    | BD Biosciences           | IF              |
| NF-kB2 p100/p52 (m)       | Cell Signaling           | WB (1:1,000)    |
| IkB- $\alpha$ (m)         | Cell Signaling           | WB (1:1,000)    |
| Phospho-IkB- $\alpha$ (m) | Cell Signaling           | WB (1:1,000)    |
| NF-kB1 p65 (m)            | Cell Signaling           | WB (1:1,000)    |
| Phospho-NF-kB1 p65 (m)    | Cell Signaling           | WB (1:1,000)    |
| SAPK/JNK (m)              | Cell Signaling           | WB (1:1,000)    |
| Phospho-SAPK/JNK (m)      | Cell Signaling           | WB (1:1,000)    |
| p38 MAPK (m)              | Cell Signaling           | WB (1:1,000)    |
| Phospho p38-MAPK (m)      | Cell Signaling           | WB (1:1,000)    |
| p105/p50 (h, m)           | Abcam                    | WB (1:1,000)    |
| c-Rel (h, m)              | Cell Signaling           | WB (1:1,000)    |
| RelB (h, m)               | Cell Signaling           | WB (1:1,000)    |
| Cdk4 (h, m)               | BD Biosciences           | WB (1:1,000)    |
| Cdk6 (h, m)               | Abcam                    | WB (1:1,000)    |
| Cyclin D2 (h, m)          | Abcam                    | WB (1:1,000)    |
| Cyclin D3 (h, m)          | Abcam                    | WB (1:1,000)    |
| Phospho-AKT (m, h)        | Abcam                    | WB (1:1,000)    |

|                                                    |                |                |
|----------------------------------------------------|----------------|----------------|
| AKT (m, h)                                         | Abcam          | WB (1:1,000)   |
| Phospho-Y416 Src (detects phospho-Y397 Lyn) (h, m) | Cell Signaling | WB (1:1,000)   |
| Lyn (m, h)                                         | Cell Signaling | WB (1:1,000)   |
| Phospho-Y352 Syk (h, m)                            | Cell Signaling | WB (1:1,000)   |
| Syk (h, m)                                         | Cell Signaling | WB (1:1,000)   |
| NFkB p65 (C-20)                                    | Santa Cruz     | EMSA (1:1,000) |
| NFkB p50 (4D1)                                     | Santa Cruz     | EMSA (1:1,000) |
| c-Rel (N)                                          | Santa Cruz     | EMSA (1:1,000) |
| RelB (C-19)                                        | Santa Cruz     | EMSA (1:1,000) |
| NFkB p52 (447)                                     | Santa Cruz     | EMSA (1:1,000) |

**Supplementary Table 9:** Antibodies used for flow cytometry.

| <b>Lineage Marker</b> | <b>Clone</b> | <b>Lineage Marker</b> | <b>Clone</b> |
|-----------------------|--------------|-----------------------|--------------|
| CD3e                  | 145-2C11     | Ly-6G (Gr1)           | RB6-8C5      |
| CD4                   | RM4-5        | CD11a                 | 2D7          |
| CD8                   | 53-6.7       | CD49d                 | R1-2         |
| CD11b (Mac-1)         | M1/70        | CD44                  | IM7          |
| CD19                  | 1D3          | CD54                  | 3E2          |
| CD16/CD32 (Fc Block)  | 2.4G2        | CD106                 | 429          |
| CD21                  | 7G6          | CD62L                 | MEL-14       |
| CD23                  | B3B4         | CD80                  |              |
| CD25                  | PC61         | CD86                  |              |
| CD45R/B220            | RA3-6B2      | CD95 (FAS)            | 2G8          |
| CD117 (cKit)          | 2B8          |                       |              |
| IgD                   | 11-26c.2a    |                       |              |
| IgM                   | R6-60.2      |                       |              |
| Ly-6A/E (Sca1)        | E13-161.7    |                       |              |
